# Supplementary material
Source: MDPI journal article supplement (https://www.mdpi.com/0718-1876/18/2/42)
Supplement: s1 [file s1]

**Table S1.** Number of documents analysed.

| Number of Documents | Document Title                                                                                                                 | Publication Year |
|---------------------|--------------------------------------------------------------------------------------------------------------------------------|------------------|
| 1                   | Blockchain and tourism: Three research propositions                                                                            | 2018             |
| 2                   | The limits of trust-free systems: A literature review on blockchain technology and trust in the sharing economy                | 2018             |
| 3                   | A Blockchain Based System to Ensure Transparency and Reliability in Food Supply Chain                                          | 2019             |
| 4                   | BLOCKCHAIN WITH EMPHASIS ON TAX LAW                                                                                            | 2019             |
| 5                   | Blockchain: a paradigm shift in business practices                                                                             | 2019             |
| 6                   | Blockchain-based Wildlife Data-Management Framework for the WWF Bison Rewilding Project                                        | 2019             |
| 7                   | BloHosT: Blockchain Enabled Smart Tourism and Hospitality Management                                                           | 2019             |
| 8                   | Can all sectors of the hospitality and tourism industry be influenced by the innovation of Blockchain technology?              | 2019             |
| 9                   | Cryptocurrencies and blockchain in tourism as a strategy to reduce poverty                                                     | 2019             |
| 10                  | Distributed Trust & Reputation Models using Blockchain Technologies for Tourism Crowdsourcing Platforms                        | 2019             |
| 11                  | Is blockchain technology a watershed for tourism development?                                                                  | 2019             |
| 12                  | New mechanism of health tourism services under the background of blockchain technology                                         | 2019             |
| 13                  | The importance of behavioral data to identify online fake reviews for tourism businesses: a systematic review                  | 2019             |
| 14                  | Trust in Tourism via Blockchain Technology: Results from a Systematic Review                                                   | 2019             |
| 15                  | User Acceptance of Usable Blockchain-Based Research Data Sharing System: An Extended TAM-Based Study                           | 2019             |
| 16                  | About on Organizational Impact on the Adoption of New Technologies in Tourism                                                  | 2020             |
| 17                  | Blockchain for Industry 4.0: A Comprehensive Review                                                                            | 2020             |
| 18                  | Blockchain in the Tourism Industry-A Review of the Situation in Croatia and Macedonia                                          | 2020             |
| 19                  | Blockchain Technology Adoption Behavior and Sustainability of the Business in Tourism and Hospitality SMEs: An Empirical Study | 2020             |
| 20                  | Blockchain Technology for Smart Tourism Destinations                                                                           | 2020             |
| 21                  | Blockchain technology framework: Current and future perspectives for the tourism industry                                      | 2020             |
| 22                  | Blockchain Technology: Adoption Perspectives in Tourism                                                                        | 2020             |
| 23                  | Blockchain-based Global Travel Review Framework                                                                                | 2020             |
| 24                  | Control, use and ownership of big data: A reciprocal view of customer big data value in the hospitality and tourism industry   | 2020             |
| 25                  | Developing P2P accommodation 4.0 when faced with COVID-19: PropTech, self-regulation and Tokenization                          | 2020             |
| 26                  | Digitalization of Tourism: Creating Tourist Information Center                                                                 | 2020             |
| 27                  | Research on Construction of a Cloud Platform for Tourism Information Intelligent Service Based on Blockchain Technology        | 2020             |

|    |                                                                                                                                                           |      |
|----|-----------------------------------------------------------------------------------------------------------------------------------------------------------|------|
| 28 | Road block(chain): bit(coin)s for tourism sustainable development goals?                                                                                  | 2020 |
| 29 | Technology assessment: Enabling Blockchain in hospitality and tourism sectors                                                                             | 2020 |
| 30 | The application of blockchain in tourism: use cases in the tourism value system                                                                           | 2020 |
| 31 | The blockchain technology and the scope of its application in hospitality operations                                                                      | 2020 |
| 32 | The impact of blockchain technology on tourism intermediation                                                                                             | 2020 |
| 33 | The Unknown Potential of Blockchain for Sustainable Supply Chains                                                                                         | 2020 |
| 34 | A critical reflection on the adoption of blockchain in tourism                                                                                            | 2021 |
| 35 | BATDIV: A Blockchain-based Approach for Tourism Data Insertion and Visualization                                                                          | 2021 |
| 36 | Blockchain for Smart Mobility-Literature Review and Future Research Agenda                                                                                | 2021 |
| 37 | Blockchain technology for smart city and smart tourism: latest trends and challenges                                                                      | 2021 |
| 38 | Blockchain Technology for Winning Consumer Loyalty: Social Norm Analysis Using Structural Equation Modeling                                               | 2021 |
| 39 | Blockchain technology in the energy sector: From basic research to real world applications                                                                | 2021 |
| 40 | BlockTour: A blockchain-based smart tourism platform                                                                                                      | 2021 |
| 41 | Cryptocurrency adoption in travel and tourism—an exploratory study of Asia Pacific travellers                                                             | 2021 |
| 42 | Decentralized Application for the Classification of Hotels Based on IPFS and Blockchain                                                                   | 2021 |
| 43 | Design of a Blockchain-Oriented System for the Sustainable Disintermediation in Tourism                                                                   | 2021 |
| 44 | Designing a tourism business model on block chain platform                                                                                                | 2021 |
| 45 | Discovering the relationship among knowledge management, sustainability marketing and service improvement: the moderating role of consumer interest       | 2021 |
| 46 | Disintermediation in medical tourism through blockchain technology: an analysis using value-focused thinking approach                                     | 2021 |
| 47 | Ensuring transparency and traceability of food local products: A blockchain application to a Smart Tourism Region                                         | 2021 |
| 48 | Formulation of Silver Tourism Digital Industry Service Platform Based on Blockchain and Internet of Things Taking Shanghai Chongming Island as an Example | 2021 |
| 49 | Interoperable Multi-Blockchain Platform Based on Integrated REST APIs for Reliable Tourism Management                                                     | 2021 |
| 50 | Is blockchain tourism's new hope?                                                                                                                         | 2021 |
| 51 | MOVING BEYOND THE CRYPTO-CURRENCY SUCCESS OF BLOCKCHAIN: A SYSTEMATIC SURVEY                                                                              | 2021 |
| 52 | Policy Recommendations for Promoting Touristic Attractivity from Local Government Perspective in Innovative Environments                                  | 2021 |
| 53 | Responsible processing of crowdsourced tourism data                                                                                                       | 2021 |
| 54 | The Benefits of Blockchain Technology for Medical Tourism                                                                                                 | 2021 |
| 55 | The Relation between Tokens and Blockchain Networks: The Case of Medical Tourism in the Republic of Moldova                                               | 2021 |

|    |                                                                                                                                     |      |
|----|-------------------------------------------------------------------------------------------------------------------------------------|------|
| 56 | The token economy as a key driver for tourism: Entering the next phase of blockchain research                                       | 2021 |
| 57 | Towards a GDPR-Compliant Blockchain-Based COVID Vaccination Passport                                                                | 2021 |
| 58 | Using cryptocurrencies and transactions in medical tourism                                                                          | 2021 |
| 59 | Using FIWARE and Blockchain in Post Pandemic Vaccination Scenario                                                                   | 2021 |
| 60 | Psychological and System-Related Barriers to Adopting Blockchain for Operations Management: An Artificial Neural Network Approach   | 2021 |
| 61 | An enabling Framework for Blockchain in Tourism                                                                                     | 2022 |
| 62 | Applications of blockchain for vaccine passport and challenges                                                                      | 2022 |
| 63 | Blockchain and tourism: Paradoxes, misconceptions, and a research roadmap                                                           | 2022 |
| 64 | Blockchain for government organizations: past, present and future                                                                   | 2022 |
| 65 | Blockchain impact on tourism                                                                                                        | 2022 |
| 66 | Blockchain technologies for museum management. The case of the loan of cultural objects                                             | 2022 |
| 67 | BLOCKCHAIN TECHNOLOGY IN THE TOURISM INDUSTRY: NEW PERSPECTIVES IN SWITZERLAND                                                      | 2022 |
| 68 | Blockchain tools for socio-economic interactions in local communities                                                               | 2022 |
| 69 | Blockchain: Is it the future for the tourism and hospitality industry?                                                              | 2022 |
| 70 | Blockchain-based entrepreneurial finance: success determinants of tourism initial coin offerings                                    | 2022 |
| 71 | Can Blockchain technology help small islands achieve sustainable tourism? A perspective on North Cyprus                             | 2022 |
| 72 | Cultural heritage preservation by using blockchain technologies                                                                     | 2022 |
| 73 | Digital Management and Optimization of Tourism Information Resources Based on Machine Learning                                      | 2022 |
| 74 | Hospitality Feedback System 4.0: Digitalization of Feedback System with Integration of Industry 4.0 Enabling Technologies           | 2022 |
| 75 | Improving sustainability in the tourism industry through blockchain technology: Challenges and opportunities                        | 2022 |
| 76 | Information and Data Analysis Based on Big Data and Blockchain Technology in Promoting the Development of Cultural Tourism Industry | 2022 |
| 77 | Information Disclosure Decision for Tourism O2O Supply Chain Based on Blockchain Technology                                         | 2022 |
| 78 | Investigation of the Effect of Blockchain-based Cryptocurrencies on Tourism Industry                                                | 2022 |
| 79 | Managing disruptions and risks amidst COVID-19 outbreaks: role of blockchain technology in developing resilient food supply chains  | 2022 |
| 80 | Opportunities for the Use of Blockchain Technology in the Tourism Industry                                                          | 2022 |
| 81 | Profiling early adopters of blockchain-based hotel booking applications: demographic, psychographic, and service-related factors    | 2022 |

|    |                                                                                                                                 |      |
|----|---------------------------------------------------------------------------------------------------------------------------------|------|
| 82 | Smart contracts in tourism industry: a model with blockchain integration for post pandemic economy                              | 2022 |
| 83 | Smart-Contract-Based Automation for OF-RAN Processes: A Federated Learning Use-Case                                             | 2022 |
| 84 | Stream-based explainable recommendations via blockchain profiling                                                               | 2022 |
| 85 | The Application Trend of Digital Finance and Technological Innovation in the Development of Green Economy                       | 2022 |
| 86 | The Impact of Blockchain Technology Adoption on Tourism Industry: A Systematic Literature Review                                | 2022 |
| 87 | The Utility of Blockchain Technology in the Electronic Commerce of Tourism Services: An Exploratory Study on Romanian Consumers | 2022 |
| 88 | Using Blockchain Technology and Sharing Culture to Promote Sustainable Forest Management in Tribal Communities                  | 2022 |
| 89 | Will blockchain shift Online Travel Agencies toward growth or to an end?                                                        | 2022 |
| 90 | Blockchain technology: a solution to address the challenges faced by the international travellers                               | 2022 |
| 91 | Crypto-urban statecraft: post-pandemic urban governance experiments in Miami                                                    | 2022 |
| 92 | Cultural roadblocks? Acceptance of blockchain-based hotel booking among individualistic and collectivistic travelers            | 2022 |
| 93 | Evaluating the opportunities, challenges and risks of applying the blockchain technology in tourism: a Delphi study approach    | 2022 |
| 94 | Shared Mobility Intelligence Using Permissioned Blockchains for Smart Cities                                                    | 2022 |
| 95 | Smart Healthcare System (SHS): Medical Tourism Delivering, Consumption, and Elevating Tool in the Ages of Smart Technologies    | 2022 |
| 96 | Uncovering research trends and opportunities on FinTech: a scientometric analysis                                               | 2022 |

---
